# Supplementary material for: Genome-wide analysis reveals divergent patterns of gene expression during zygotic and somatic embryo maturation of Theobroma cacao L., the chocolate tree
Source: PubMed Central journal article supplement (PMC4110631; doi:10.1186/1471-2229-14-185), 2014-07-16

# Additional file 4

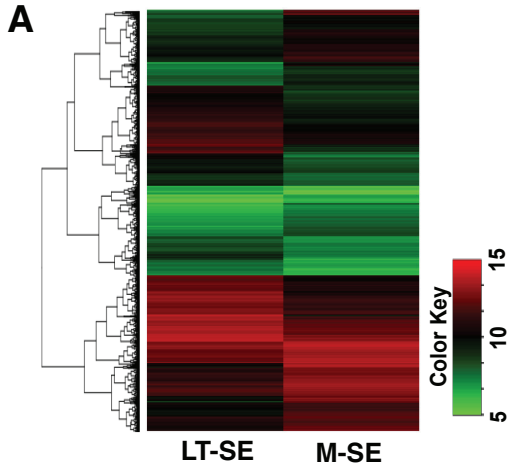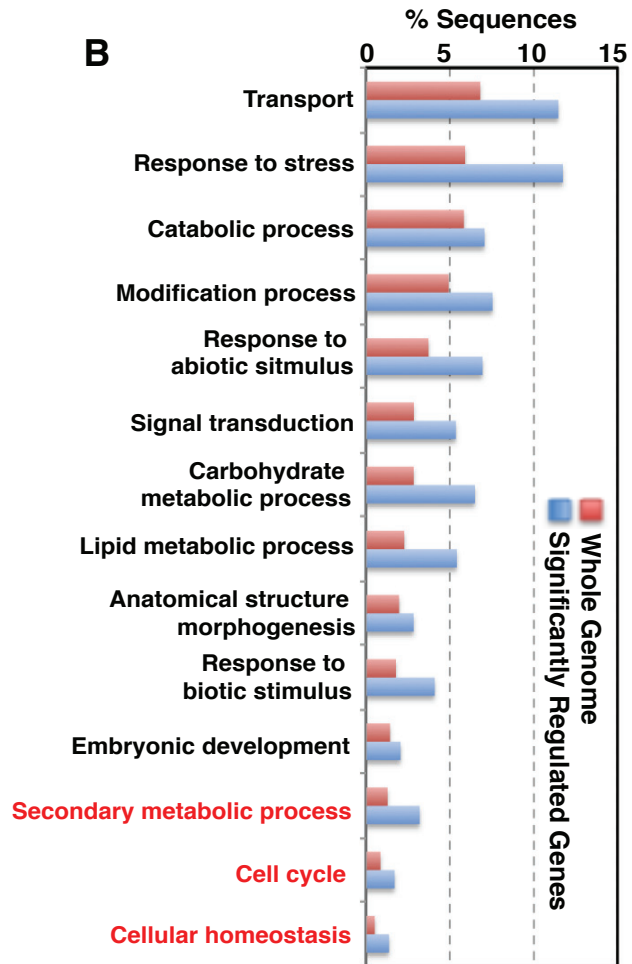

Supplement: 1471-2229-14-185-S4.pdf [file 1471-2229-14-185-S4.pdf]
